# Supplementary material
Source: Springer Nature journal article supplement (https://www.springermedizin.de/resource/supplementary/12905_2013_375_MOESM4_ESM.pdf/9518586)
Supplement: MOESM4 [file 9518586]

**Disagree most****Agree most**

| <b>-4</b> | <b>-3</b> | <b>-2</b> | <b>-1</b> | <b>0</b> | <b>+1</b> | <b>+2</b> | <b>+3</b> | <b>+4</b> |
|-----------|-----------|-----------|-----------|----------|-----------|-----------|-----------|-----------|
| 38**      | 4         | 3*        | 1         | 2**      | 19*       | 18        | 8         | 6*        |
| 39**      | 12        | 24        | 5         | 9        | 23        | 22*       | 10        | 7         |
|           | 14        | 25        | 13        | 15       | 29        | 30        | 17        |           |
|           |           | 28        | 16        | 21       | 31        | 36        |           |           |
|           |           | 37        | 27        | 26       | 32        | 20        |           |           |
|           |           |           | 34        | 35       | 33        |           |           |           |
|           |           |           |           | 11       |           |           |           |           |
